# Supplementary material
Source: PubMed Central journal article supplement (PMC11558395)
Supplement: ajtr0016-5441-f6.pdf [file ajtr0016-5441-f6.pdf]

*Morinda officinalis* saponins promote osteogenic differentiation

**Table S1.** The result of GO enrichment including BP and MP from the DEGs

| Function | ID         | Description                                                     | BgRatio   | pvalue    | p.adjust  | qvalue    | geneID                                                                            | Count |
|----------|------------|-----------------------------------------------------------------|-----------|-----------|-----------|-----------|-----------------------------------------------------------------------------------|-------|
| BP       | GO:0003177 | pulmonary valve development                                     | 21/18866  | 4.772E-07 | 0.0013285 | 0.0011267 | BMP4/HEY1/SMAD6/STRA6/TNFRSF1B                                                    | 5     |
|          | GO:0036293 | response to decreased oxygen levels                             | 371/18866 | 1.168E-06 | 0.0016257 | 0.0013788 | ANKRD1/CITED2/CPEB1/CXCR4/DDAH1/DDIT4/EDN1/EGLN3/HILPDA/MYB/NDNF/OXTR/PMAIP1/RGCC | 14    |
|          | GO:0070482 | response to oxygen levels                                       | 396/18866 | 2.507E-06 | 0.0023268 | 0.0019733 | ANKRD1/CITED2/CPEB1/CXCR4/DDAH1/DDIT4/EDN1/EGLN3/HILPDA/MYB/NDNF/OXTR/PMAIP1/RGCC | 14    |
|          | GO:0001666 | response to hypoxia                                             | 359/18866 | 4.492E-06 | 0.0024075 | 0.0020418 | ANKRD1/CITED2/CPEB1/CXCR4/DDAH1/DDIT4/EDN1/EGLN3/HILPDA/MYB/NDNF/PMAIP1/RGCC      | 13    |
|          | GO:0071456 | cellular response to hypoxia                                    | 208/18866 | 5.144E-06 | 0.0024075 | 0.0020418 | ANKRD1/CITED2/CPEB1/DDAH1/EDN1/EGLN3/HILPDA/NDNF/PMAIP1/RGCC                      | 10    |
|          | GO:0003007 | heart morphogenesis                                             | 258/18866 | 5.439E-06 | 0.0024075 | 0.0020418 | ADAMTS1/ADGRG6/ANKRD1/BMP4/CITED2/HEY1/PKP2/S1PR1/SMAD6/SOX17/SYNPO2L             | 11    |
|          | GO:0048863 | stem cell differentiation                                       | 264/18866 | 6.767E-06 | 0.0024075 | 0.0020418 | BMP4/EDN1/KBTBD8/KIT/MYB/PRICKLE1/SEMA6A/SEMA6D/SHC4/SOX17/SOX6                   | 11    |
|          | GO:0003184 | pulmonary valve morphogenesis                                   | 17/18866  | 7.574E-06 | 0.0024075 | 0.0020418 | BMP4/HEY1/SMAD6/STRA6                                                             | 4     |
|          | GO:0036294 | cellular response to decreased oxygen levels                    | 218/18866 | 7.783E-06 | 0.0024075 | 0.0020418 | ANKRD1/CITED2/CPEB1/DDAH1/EDN1/EGLN3/HILPDA/NDNF/PMAIP1/RGCC                      | 10    |
|          | GO:1905314 | semi-lunar valve development                                    | 37/18866  | 9.252E-06 | 0.0025759 | 0.0021846 | BMP4/HEY1/SMAD6/STRA6/TNFRSF1B                                                    | 5     |
|          | GO:1905207 | regulation of cardiocyte differentiation                        | 66/18866  | 1.201E-05 | 0.0030406 | 0.0025787 | BMP4/EDN1/PRICKLE1/RGS4/SOX17/SOX6                                                | 6     |
|          | GO:0071453 | cellular response to oxygen levels                              | 235/18866 | 1.498E-05 | 0.003399  | 0.0028827 | ANKRD1/CITED2/CPEB1/DDAH1/EDN1/EGLN3/HILPDA/NDNF/PMAIP1/RGCC                      | 10    |
|          | GO:0071902 | positive regulation of protein serine/threonine kinase activity | 345/18866 | 1.587E-05 | 0.003399  | 0.0028827 | ADRB2/BMP4/CEMIP/CXCR4/DUSP5/EDN1/KIT/LPAR3/NEK10/NGF/NTF3/RGCC                   | 12    |
|          | GO:0001558 | regulation of cell growth                                       | 420/18866 | 2.387E-05 | 0.0046153 | 0.0039141 | BDKRB1/CDKN2C/CXCR4/EDN1/HBEGF/LPAR3/NGF/NPPB/RGS4/SEMA6A/SEMA6D/SOCS2/SOX17      | 13    |
|          | GO:0050769 | positive regulation of neurogenesis                             | 485/18866 | 2.487E-05 | 0.0046153 | 0.0039141 | ANKRD1/BMP4/CXCR4/KIT/LPAR3/MYB/NDNF/NGF/ROR1/SEMA6A/SOCS2/TNFRSF1B/TOX/ZNF804A   | 14    |
|          | GO:0071560 | cellular response to transforming growth factor beta stimulus   | 252/18866 | 2.73E-05  | 0.0047505 | 0.0040288 | ANKRD1/CITED2/EDN1/ID1/LDLRAD4/SMAD6/SMAD9/SMURF2/SOX6/ZNF703                     | 10    |
|          | GO:0045926 | negative regulation of growth                                   | 254/18866 | 2.92E-05  | 0.0047827 | 0.0040561 | ADRB2/BDKRB1/BMP4/CDKN2C/NPPB/RGS4/SEMA6A/SEMA6D/SOCS2/SOX17                      | 10    |
|          | GO:0071559 | response to transforming growth factor beta                     | 258/18866 | 3.335E-05 | 0.0051413 | 0.0043602 | ANKRD1/CITED2/EDN1/ID1/LDLRAD4/SMAD6/SMAD9/SMURF2/SOX6/ZNF703                     | 10    |
|          | GO:0045446 | endothelial cell differentiation                                | 117/18866 | 3.509E-05 | 0.0051413 | 0.0043602 | ATOH8/BMP4/CXCR4/HEY1/ID1/S1PR1/SOX17                                             | 7     |
|          | GO:0050954 | sensory perception of mechanical stimulus                       | 173/18866 | 6.119E-05 | 0.0084483 | 0.0071648 | ATP8B1/CEMIP/CXCR4/KIT/MBP/ROR1/TFAP2A/USP53                                      | 8     |
|          | GO:0003205 | cardiac chamber development                                     | 174/18866 | 6.373E-05 | 0.0084483 | 0.0071648 | ADAMTS1/ADGRG6/BMP4/CITED2/HEY1/PKP2/SMAD6/STRA6                                  | 8     |
|          | GO:0003206 | cardiac chamber morphogenesis                                   | 131/18866 | 7.217E-05 | 0.0086822 | 0.0073632 | ADAMTS1/ADGRG6/BMP4/CITED2/HEY1/PKP2/SMAD6                                        | 7     |
|          | GO:0043405 | regulation of MAP kinase activity                               | 342/18866 | 7.336E-05 | 0.0086822 | 0.0073632 | BMP4/CXCR4/DUSP5/DUSP8/EDN1/KIT/LPAR3/NEK10/NGF/NTF3/RGS4                         | 11    |
|          | GO:0048762 | mesenchymal cell differentiation                                | 229/18866 | 7.485E-05 | 0.0086822 | 0.0073632 | BMP4/EDN1/HEY1/KBTBD8/LDLRAD4/RGCC/SEMA6A/SEMA6D/ZNF703                           | 9     |

## *Morinda officinalis* saponins promote osteogenic differentiation

|    |            |                                                                                                                                       |           |           |           |           |                                                                                  |    |
|----|------------|---------------------------------------------------------------------------------------------------------------------------------------|-----------|-----------|-----------|-----------|----------------------------------------------------------------------------------|----|
|    | GO:0003158 | endothelium development                                                                                                               | 135/18866 | 8.725E-05 | 0.009509  | 0.0080644 | ATO8/BMP4/CXCR4/HEY1/ID1/S1PR1/SOX17                                             | 7  |
|    | GO:0060485 | mesenchyme development                                                                                                                | 290/18866 | 8.88E-05  | 0.009509  | 0.0080644 | BMP4/CITED2/EDN1/HEY1/KBTBD8/<br>LDLRAD4/RGCC/SEMA6A/SEMA6D/ZNF703               | 10 |
|    | GO:0003073 | regulation of systemic arterial blood pressure                                                                                        | 95/18866  | 9.562E-05 | 0.0098597 | 0.0083618 | ADRB2/DDAH1/EDN1/NPPB/OXTR/SLC2A5                                                | 6  |
|    | GO:0003170 | heart valve development                                                                                                               | 61/18866  | 0.0001088 | 0.0108168 | 0.0091735 | BMP4/HEY1/SMAD6/STRA6/TNFRSF1B                                                   | 5  |
|    | GO:0016049 | cell growth                                                                                                                           | 490/18866 | 0.0001147 | 0.0110069 | 0.0093347 | BDKRB1/CDKN2C/CXCR4/EDN1/HBEGF/LPAR3/<br>NGF/NPPB/RGS4/SEMA6A/SEMA6D/SOCS2/SOX17 | 13 |
|    | GO:0051482 | positive regulation of cytosolic calcium ion concentration involved in phospholipase C-activating G protein-coupled signaling pathway | 34/18866  | 0.0001333 | 0.0119667 | 0.0101487 | EDN1/F2RL2/LPAR3/S1PR1                                                           | 4  |
| MF | GO:0070412 | R-SMAD binding                                                                                                                        | 23/18352  | 3.026E-05 | 0.0070382 | 0.0063918 | ANKRD1/LDLRAD4/RGCC/SMAD6                                                        | 4  |
|    | GO:0046332 | SMAD binding                                                                                                                          | 79/18352  | 3.943E-05 | 0.0070382 | 0.0063918 | ANKRD1/LDLRAD4/RGCC/SMAD6/<br>SMAD9/SMURF2                                       | 6  |
|    | GO:0005539 | glycosaminoglycan binding                                                                                                             | 232/18352 | 0.0005459 | 0.064967  | 0.0589999 | ADAMTS1/ADAMTS15/BMP4/CEMIP/<br>CXCL6/HBEGF/NDNF/TNFAIP6                         | 8  |
|    | GO:0048018 | receptor ligand activity                                                                                                              | 487/18352 | 0.0018027 | 0.1128224 | 0.10246   | BMP4/CCL20/CXCL6/EDN1/FGF5/HBEGF/<br>NGF/NPPB/NTF3/SEMA6A/SEMA6D                 | 11 |
|    | GO:0030546 | signaling receptor activator activity                                                                                                 | 492/18352 | 0.0019526 | 0.1128224 | 0.10246   | BMP4/CCL20/CXCL6/EDN1/FGF5/HBEGF/<br>NGF/NPPB/NTF3/SEMA6A/SEMA6D                 | 11 |
|    | GO:0008201 | heparin binding                                                                                                                       | 169/18352 | 0.0023412 | 0.1128224 | 0.10246   | ADAMTS1/ADAMTS15/BMP4/CXCL6/<br>HBEGF/NDNF                                       | 6  |
|    | GO:0008330 | protein tyrosine/threonine phosphatase activity                                                                                       | 10/18352  | 0.0027127 | 0.1128224 | 0.10246   | DUSP5/DUSP8                                                                      | 2  |
|    | GO:0032052 | bile acid binding                                                                                                                     | 10/18352  | 0.0027127 | 0.1128224 | 0.10246   | AKR1C1/AKR1C2                                                                    | 2  |
|    | GO:0016813 | hydrolase activity, acting on carbon-nitrogen (but not peptide) bonds, in linear amidines                                             | 11/18352  | 0.0032983 | 0.1128224 | 0.10246   | DDAH1/PADI1                                                                      | 2  |
|    | GO:0004032 | alditol:NADP+ 1-oxidoreductase activity                                                                                               | 12/18352  | 0.0039374 | 0.1128224 | 0.10246   | AKR1C1/AKR1C2                                                                    | 2  |
|    | GO:0005165 | neurotrophin receptor binding                                                                                                         | 12/18352  | 0.0039374 | 0.1128224 | 0.10246   | NGF/NTF3                                                                         | 2  |
|    | GO:0017017 | MAP kinase tyrosine/serine/threonine phosphatase activity                                                                             | 13/18352  | 0.004629  | 0.1128224 | 0.10246   | DUSP5/DUSP8                                                                      | 2  |
|    | GO:0030548 | acetylcholine receptor regulator activity                                                                                             | 13/18352  | 0.004629  | 0.1128224 | 0.10246   | LYPD6/LYPD6B                                                                     | 2  |
|    | GO:0099602 | neurotransmitter receptor regulator activity                                                                                          | 13/18352  | 0.004629  | 0.1128224 | 0.10246   | LYPD6/LYPD6B                                                                     | 2  |
|    | GO:1901681 | sulfur compound binding                                                                                                               | 262/18352 | 0.0050388 | 0.1128224 | 0.10246   | ADAMTS1/ADAMTS15/BMP4/CXCL6/<br>HBEGF/NDNF/PTGES                                 | 7  |
|    | GO:0033549 | MAP kinase phosphatase activity                                                                                                       | 14/18352  | 0.0053725 | 0.1128224 | 0.10246   | DUSP5/DUSP8                                                                      | 2  |
|    | GO:0070411 | I-SMAD binding                                                                                                                        | 14/18352  | 0.0053725 | 0.1128224 | 0.10246   | SMAD6/SMAD9                                                                      | 2  |
|    | GO:0005126 | cytokine receptor binding                                                                                                             | 271/18352 | 0.0060354 | 0.1197027 | 0.1087084 | CCL20/CXCL6/NGF/NTF3/SMAD6/<br>SMURF2/SOCS2                                      | 7  |
|    | GO:0045125 | bioactive lipid receptor activity                                                                                                     | 16/18352  | 0.0070113 | 0.1257985 | 0.1142443 | LPAR3/S1PR1                                                                      | 2  |
|    | GO:0031406 | carboxylic acid binding                                                                                                               | 212/18352 | 0.0070475 | 0.1257985 | 0.1142443 | AKR1C1/AKR1C2/CEMIP/DDAH1/<br>EGLN3/TNFAIP6                                      | 6  |
|    | GO:0043177 | organic acid binding                                                                                                                  | 224/18352 | 0.0091159 | 0.1549706 | 0.140737  | AKR1C1/AKR1C2/CEMIP/DDAH1/<br>EGLN3/TNFAIP6                                      | 6  |
|    | GO:0008083 | growth factor activity                                                                                                                | 162/18352 | 0.0095943 | 0.1556896 | 0.1413899 | BMP4/FGF5/HBEGF/NGF/NTF3                                                         | 5  |
|    | GO:0005123 | death receptor binding                                                                                                                | 20/18352  | 0.0108729 | 0.1687657 | 0.1532651 | NGF/NTF3                                                                         | 2  |

## *Morinda officinalis* saponins promote osteogenic differentiation

|            |                                                                |          |           |           |           |                   |   |
|------------|----------------------------------------------------------------|----------|-----------|-----------|-----------|-------------------|---|
| GO:0008106 | alcohol dehydrogenase (NADP+) activity                         | 21/18352 | 0.0119552 | 0.1731651 | 0.1572604 | AKR1C1/AKR1C2     | 2 |
| GO:0098631 | cell adhesion mediator activity                                | 60/18352 | 0.0121264 | 0.1731651 | 0.1572604 | MADCAM1/NEXN/PKP2 | 3 |
| GO:0005540 | hyaluronic acid binding                                        | 22/18352 | 0.0130827 | 0.1796362 | 0.1631371 | CEMIP/TNFAIP6     | 2 |
| GO:0030215 | semaphorin receptor binding                                    | 23/18352 | 0.0142547 | 0.1884788 | 0.1711675 | SEMA6A/SEMA6D     | 2 |
| GO:0005160 | transforming growth factor beta receptor binding               | 24/18352 | 0.0154703 | 0.1904446 | 0.1729528 | SMAD6/SMURF2      | 2 |
| GO:0070696 | transmembrane receptor protein serine/threonine kinase binding | 24/18352 | 0.0154703 | 0.1904446 | 0.1729528 | BMP4/SMAD6        | 2 |
| GO:0001965 | G-protein alpha-subunit binding                                | 26/18352 | 0.0180294 | 0.2011404 | 0.1826662 | LPAR3/RGS4        | 2 |

**Table S2.** The result of KEGG enrichment from the DEGs

| ID       | Description                                                   | BgRatio  | pvalue    | p.adjust  | qvalue      | geneID                                                | Count |
|----------|---------------------------------------------------------------|----------|-----------|-----------|-------------|-------------------------------------------------------|-------|
| hsa04350 | TGF-beta signaling pathway                                    | 94/8115  | 0.0014218 | 0.1491827 | 0.138030287 | BMP4/ID1/SMAD6/SMAD9/SMURF2                           | 5     |
| hsa04015 | Rap1 signaling pathway                                        | 210/8115 | 0.002491  | 0.1491827 | 0.138030287 | EFNA4/FGF5/ID1/KIT/LPAR3/NGF/PLCB4                    | 7     |
| hsa04924 | Renin secretion                                               | 69/8115  | 0.0031891 | 0.1491827 | 0.138030287 | ADRB2/EDN1/GUCY1A2/PLCB4                              | 4     |
| hsa04080 | Neuroactive ligand-receptor interaction                       | 353/8115 | 0.0038008 | 0.1491827 | 0.138030287 | ADRB2/BDKRB1/EDN1/F2RL2/LPAR3/LYPD6/LYPD6B/OXTR/S1PR1 | 9     |
| hsa04020 | Calcium signaling pathway                                     | 240/8115 | 0.0052076 | 0.1635191 | 0.151294915 | ADRB2/BDKRB1/CXCR4/FGF5/NGF/OXTR/PLCB4                | 7     |
| hsa04072 | Phospholipase D signaling pathway                             | 148/8115 | 0.0099075 | 0.2460824 | 0.227686046 | CYTH3/KIT/LPAR3/PLCB4/SHC4                            | 5     |
| hsa04061 | Viral protein interaction with cytokine and cytokine receptor | 100/8115 | 0.0117809 | 0.2460824 | 0.227686046 | CCL20/CXCL6/CXCR4/TNFRSF1B                            | 4     |
| hsa04151 | PI3K-Akt signaling pathway                                    | 354/8115 | 0.0126935 | 0.2460824 | 0.227686046 | DDIT4/EFNA4/FGF5/KIT/LPAR3/MYB/NGF/NTF3               | 8     |
| hsa04010 | MAPK signaling pathway                                        | 294/8115 | 0.0150276 | 0.2460824 | 0.227686046 | DUSP5/DUSP8/EFNA4/FGF5/KIT/NGF/NTF3                   | 7     |
| hsa04014 | Ras signaling pathway                                         | 232/8115 | 0.0166325 | 0.2460824 | 0.227686046 | EFNA4/FGF5/KIT/NGF/NTF3/SHC4                          | 6     |
| hsa04668 | TNF signaling pathway                                         | 112/8115 | 0.0172414 | 0.2460824 | 0.227686046 | CCL20/CXCL6/EDN1/TNFRSF1B                             | 4     |
| hsa04360 | Axon guidance                                                 | 182/8115 | 0.022419  | 0.2933146 | 0.271387335 | CXCR4/EFNA4/SEMA6A/SEMA6D/TRPC4                       | 5     |
| hsa04062 | Chemokine signaling pathway                                   | 192/8115 | 0.0274618 | 0.3316535 | 0.306860108 | CCL20/CXCL6/CXCR4/PLCB4/SHC4                          | 5     |
| hsa04270 | Vascular smooth muscle contraction                            | 134/8115 | 0.0308559 | 0.3460269 | 0.320158954 | EDN1/GUCY1A2/NPPB/PLCB4                               | 4     |
| hsa04915 | Estrogen signaling pathway                                    | 138/8115 | 0.0338572 | 0.3543722 | 0.327880368 | HBEGF/KRT34/PLCB4/SHC4                                | 4     |
| hsa04610 | Complement and coagulation cascades                           | 85/8115  | 0.039441  | 0.3804648 | 0.352022455 | BDKRB1/F2RL2/F3                                       | 3     |
| hsa05224 | Breast cancer                                                 | 147/8115 | 0.0412163 | 0.3804648 | 0.352022455 | FGF5/HEY1/KIT/SHC4                                    | 4     |
| hsa04060 | Cytokine-cytokine receptor interaction                        | 295/8115 | 0.0462678 | 0.3804648 | 0.352022455 | BMP4/CCL20/CXCL6/CXCR4/NGF/TNFRSF1B                   | 6     |
| hsa04970 | Salivary secretion                                            | 93/8115  | 0.0493109 | 0.3804648 | 0.352022455 | ADRB2/GUCY1A2/PLCB4                                   | 3     |
